# Supplementary material for: Improvement in the Biosynthesis of Antioxidant-Active Metabolites in In Vitro Cultures of Isatis tinctoria (Brassicaceae) by Biotechnological Methods/Elicitation and Precursor Feeding
Source: MDPI journal article supplement (doi:10.3390/antiox12051111), 2023-05-17
Supplement: s1 [file s1]

# Improvement in the Biosynthesis of Antioxidant-Active Metabolites in In Vitro Cultures of *Isatis tinctoria* (Brassicaceae) by Biotechnological Methods/Elicitation and Precursor Feeding

Natalizia Miceli <sup>1,\*†</sup>, Inga Kwiecień <sup>2,\*†</sup>, Noemi Nicosia <sup>3,4</sup>, Jasmine Speranza <sup>3,5</sup>, Salvatore Ragusa <sup>6</sup>, Emilia Cavò <sup>1,3</sup>, Federica Davì <sup>1,3</sup>, Maria Fernanda Taviano <sup>1</sup> and Halina Ekiert <sup>2</sup>

<sup>1</sup> Department of Chemical, Biological, Pharmaceutical and Environmental Sciences, University of Messina, Viale Ferdinando Stagno d'Alcontres 31, 98166 Messina, Italy; emilia.cavo@unime.it (E.C.); federica.davi@unime.it (F.D.); mtaviano@unime.it (M.F.T.)

<sup>2</sup> Department of Pharmaceutical Botany, Faculty of Pharmacy, Jagiellonian University Medical College, Medyczna 9 Str., 30-688 Krakow, Poland; halina.ekiert@uj.edu.pl

<sup>3</sup> Foundation "Prof. Antonio Imbesi", University of Messina, Piazza Pugliatti 1, 98122 Messina, Italy; nicosia.noemi@hsr.it (N.N.); js1101@leicester.ac.uk (J.S.)

<sup>4</sup> Division of Neuroscience, Vita Salute San Raffaele University, 20132 Milan, Italy

<sup>5</sup> Department of Genetics and Genome Biology, University of Leicester, University Road, Leicester LE1 7RH, UK

<sup>6</sup> PLANTA/Research, Documentation and Training Center, Via Serraglio Vecchio 28, 90123 Palermo, Italy; sragusa@unicz.it

\* Correspondence: nmiceli@unime.it (N.M.); inga.kwiecien@uj.edu.pl (I.K.)

† These authors contributed equally to this work.

## Supplementary Materials

**Table S1.** Percentage yields of hydroalcoholic extracts obtained from *Isatis tinctoria* shoot cultures grown on different MS medium variants

| MS Medium Variant BAP/NAA (mg/L) | Yield of extracts from <i>Isatis tinctoria</i> agitated shoot cultures (%) |
|----------------------------------|----------------------------------------------------------------------------|
| 2.0/1.0                          | 43.17                                                                      |
| 1.0/0.5                          | 36.73                                                                      |
| 1.0/1.0                          | 51.40                                                                      |
| 1.0/0                            | 49.17                                                                      |
| 0.5/0                            | 48.71                                                                      |
| 0/1.0                            | 61.20                                                                      |

**Table S2.** Percentage yields of hydroalcoholic extracts obtained from *Isatis tinctoria* elicited shoot cultures (MS variant BAP/NAA 1.0/1.0 mg/L).

| Elicitors         |                      | Yield of extracts from <i>Isatis tinctoria</i><br>elicited shoot cultures (%) |       |       |       |
|-------------------|----------------------|-------------------------------------------------------------------------------|-------|-------|-------|
|                   |                      | 24 h                                                                          | 48 h  | 120 h | 168 h |
| MeJa              | 10 µM                | 44.38                                                                         | 36.76 | 33.85 | 28.66 |
|                   | 50 µM                | 40.56                                                                         | 33.35 | 23.23 | 19.90 |
|                   | 100 µM               | 41.58                                                                         | 37.28 | 31.19 | 11.96 |
|                   | Ctr EtOH 50%         | 43.04                                                                         | 33.25 | 29.46 | 10.25 |
| CaCl <sub>2</sub> | 20 mM                | 38.37                                                                         | 11.38 | 16.69 | 35.82 |
|                   | 50 mM                | 38.63                                                                         | 17.09 | 22.73 | 26.32 |
|                   | 100 mM               | 42.83                                                                         | 19.05 | 22.44 | 30.81 |
|                   | Ctr H <sub>2</sub> O | 34.28                                                                         | 31.38 | 30.40 | 33.23 |
| AgNO <sub>3</sub> | 0.5 mM               | 34.25                                                                         | 18    | 19.97 |       |
|                   | 1 mM                 | 34.21                                                                         | 27.5  | 20.33 |       |
|                   | 2 mM                 | 34.33                                                                         | 22    | 7     |       |
|                   | Ctr H <sub>2</sub> O | 34.28                                                                         | 31.38 | 30.40 |       |
| YE extract        | 50 mg/L              |                                                                               | 30.12 | 10.18 | 15.54 |
|                   | 200 mg/L             |                                                                               | 29.20 | 29.21 | 33    |
|                   | 300 mg/L             |                                                                               | 21.93 | 40.68 | 14.12 |
|                   | Ctr H <sub>2</sub> O |                                                                               | 31.38 | 30.40 | 33.23 |

MeJa – methyl jasmonate; YE – Yeast extract

**Table S3.** Percentage yields of hydroalcoholic extracts obtained from *Isatis tinctoria* precursors feeding shoot cultures (MS variant BAP/NAA 1.0/1.0 mg/L supplemented with precursor Phe and Tyr).

| Precursor (g/L) |                      | Yield of extracts from <i>Isatis tinctoria</i><br>elicited shoot cultures (%) |       |       |
|-----------------|----------------------|-------------------------------------------------------------------------------|-------|-------|
|                 |                      | 72 h                                                                          | 120 h | 168 h |
| Phe             | 1                    | 26.17                                                                         | 40.90 | 23.90 |
|                 | 2                    | 30.76                                                                         | 38.03 | 30.80 |
|                 | Ctr H <sub>2</sub> O | 14.30                                                                         | 30.40 | 33.23 |
| Tyr             | 1                    | 50.71                                                                         | 35.06 | 12.27 |
|                 | 2                    | 26.96                                                                         | 17.54 | 14    |
|                 | Ctr H <sub>2</sub> O | 14.30                                                                         | 30.40 | 33.23 |

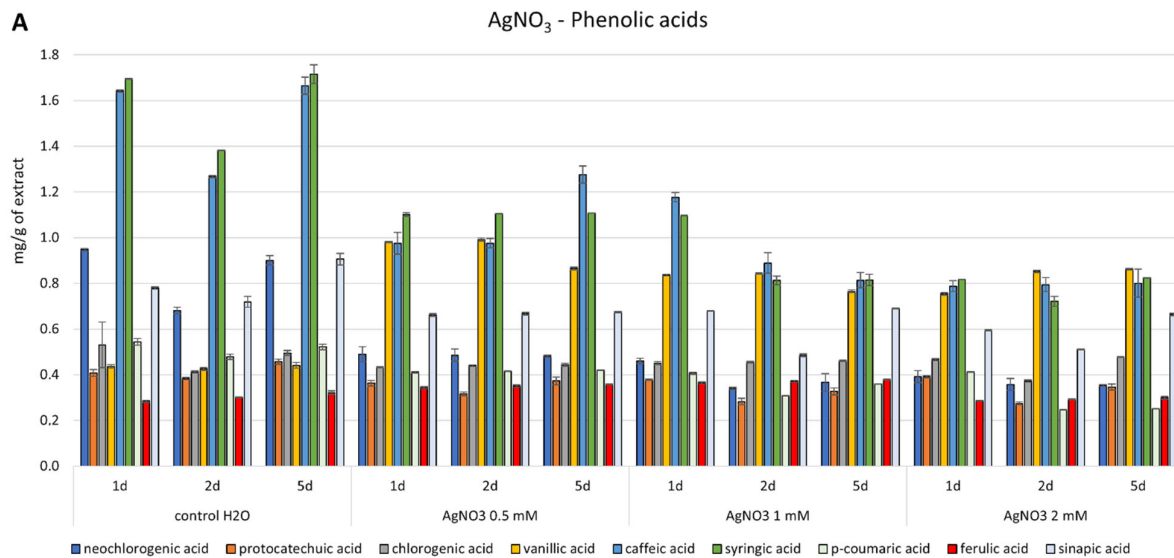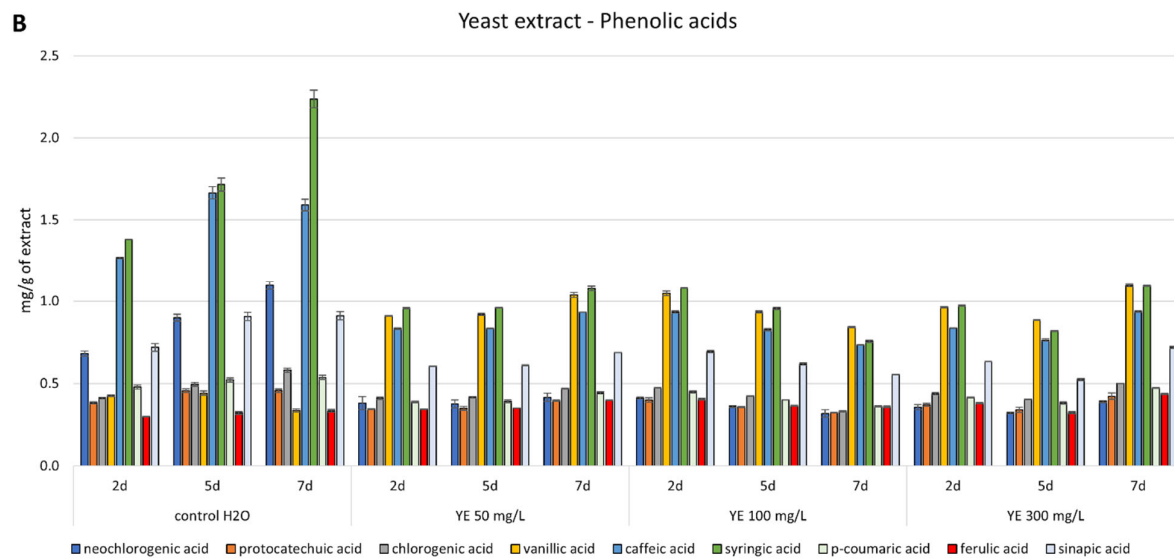

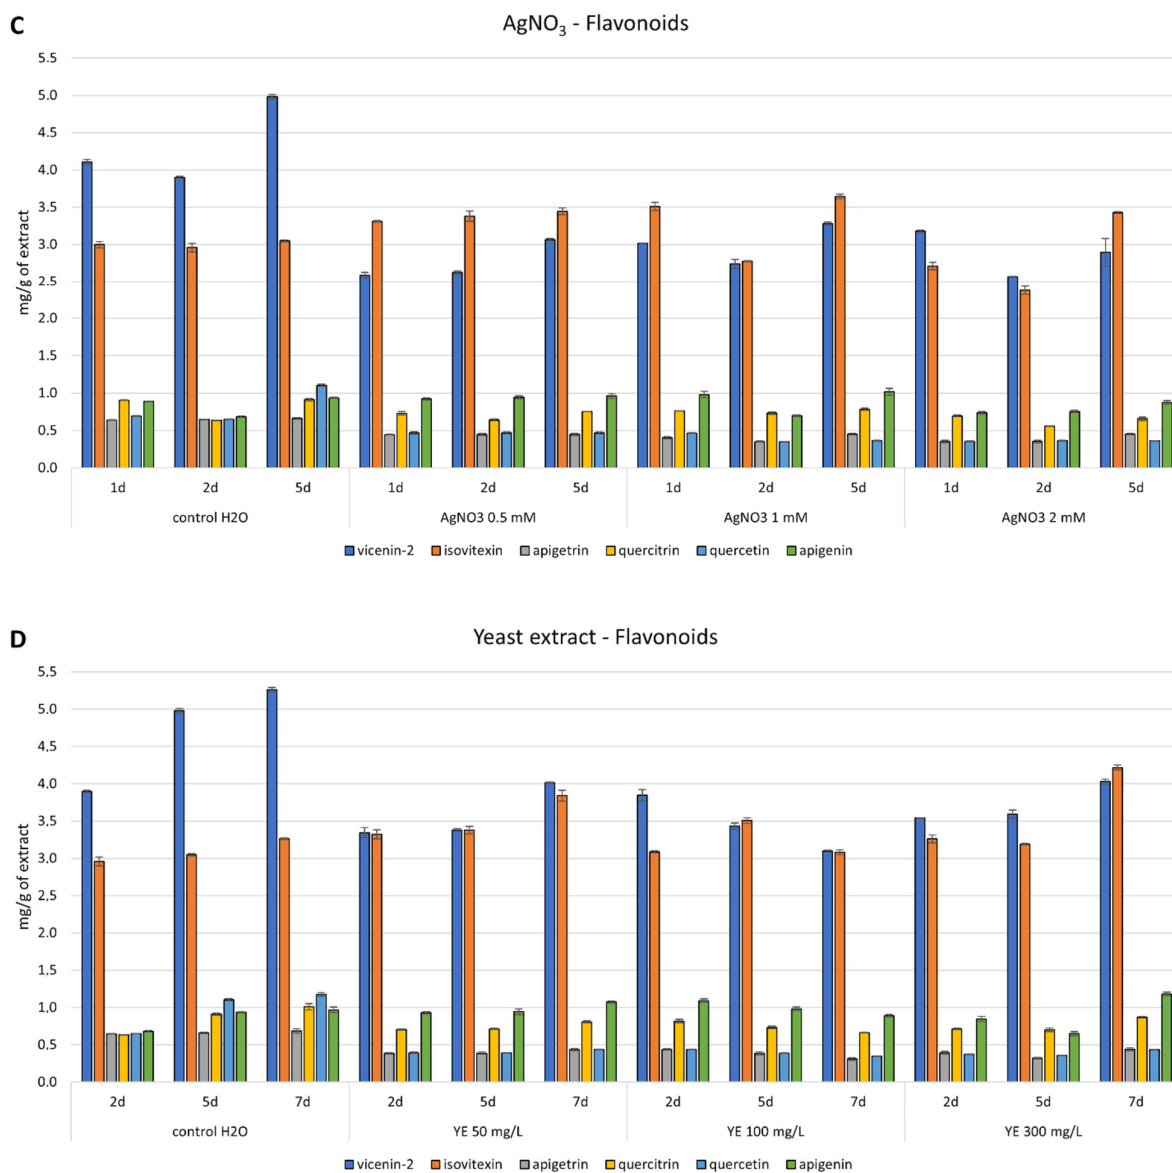

**Figure S1.** Content of phenolic acids and flavonoids, determined by RP-HPLC analysis, in *Isatis tinctoria in vitro* culture extracts elicited by Silver nitrate -  $\text{AgNO}_3$  (A, C), and Yeast extract – YE (B, D). Values are expressed as the mean  $\pm$  SD (n = 3).
